# Supplementary material
Source: publisher figshare collection journal article supplement (https://acs.figshare.com/ndownloader/files/3956698)

## Supporting Information

“Microwave-assisted green synthesis of silver nanoparticles using orange peel extract.”

GA Kahrilas, LM Wally, SJ Fredrick, M Hiskey, AL Prieto, and JE Owens

We present data for batch-to-batch variation of silver nanoparticles (AgNPs) synthesized with orange peel extract. These samples were prepared in the CEM microwave for 15 min. The relative standard deviation (as a measure of precision) is provided and is, in most cases, less than 20%.

**Table S1: Indicators of batch-to-batch variation for AgNPs synthesized with orange peel extract in the CEM microwave for 15 min (temperature may vary)**

| Replicate # | Temp (°C) | $\lambda_{\max}$ | Absorbance (AU) | Normalized Absorbance <sup>1</sup> | Norm. Abs. / Mass (g) of AgNO <sub>3</sub> | Peak Width at Half-Maximum |
|-------------|-----------|------------------|-----------------|------------------------------------|--------------------------------------------|----------------------------|
| 1           | 75.0      | 416              | 2.02            | 2.02                               | 91.5                                       | 131                        |
| 2           | 100.      | 416              | 1.28            | 2.57                               | 110                                        | 193                        |
| 3           | 90.0      | 428              | 1.40            | 2.80                               | 105                                        | 180                        |
| 4           | 90.0      | 425              | 1.51            | 3.03                               | 122                                        | 188                        |
| 5           | 90.0      | 420              | 1.62            | 1.62                               | 70.4                                       | 149                        |
| Mean        | 89.0      | 421              | 1.57            | 2.41                               | 99.8                                       | 168                        |
| Std Dev     | 8.94      | 5.39             | 0.284           | 0.578                              | 19.7                                       | 26.9                       |
| RSD, %      | 10.1      | 1.28             | 18.1            | 24.0                               | 19.8                                       | 16.0                       |

<sup>1</sup>Sample replicates 2, 3, and 4 exceed the 2 AU limit of the UV-Vis spectrophotometer. These samples were diluted in a 1:1 ratio with 18 M $\Omega$  DI water and re-analyzed.

The following GC/MS chromatograms of the various citrus peel extracts utilized in the microwave-assisted syntheses of silver nanoparticles (AgNPs) are provided. Arrows indicate the highest abundance of a particular compound in a given extract when compared to the other extracts. Samples that were analyzed included orange, grapefruit, tangelo, lemon, and lime extracts. Finally, a reagent blank is provided.

**Figure S1: Orange Peel Extract**

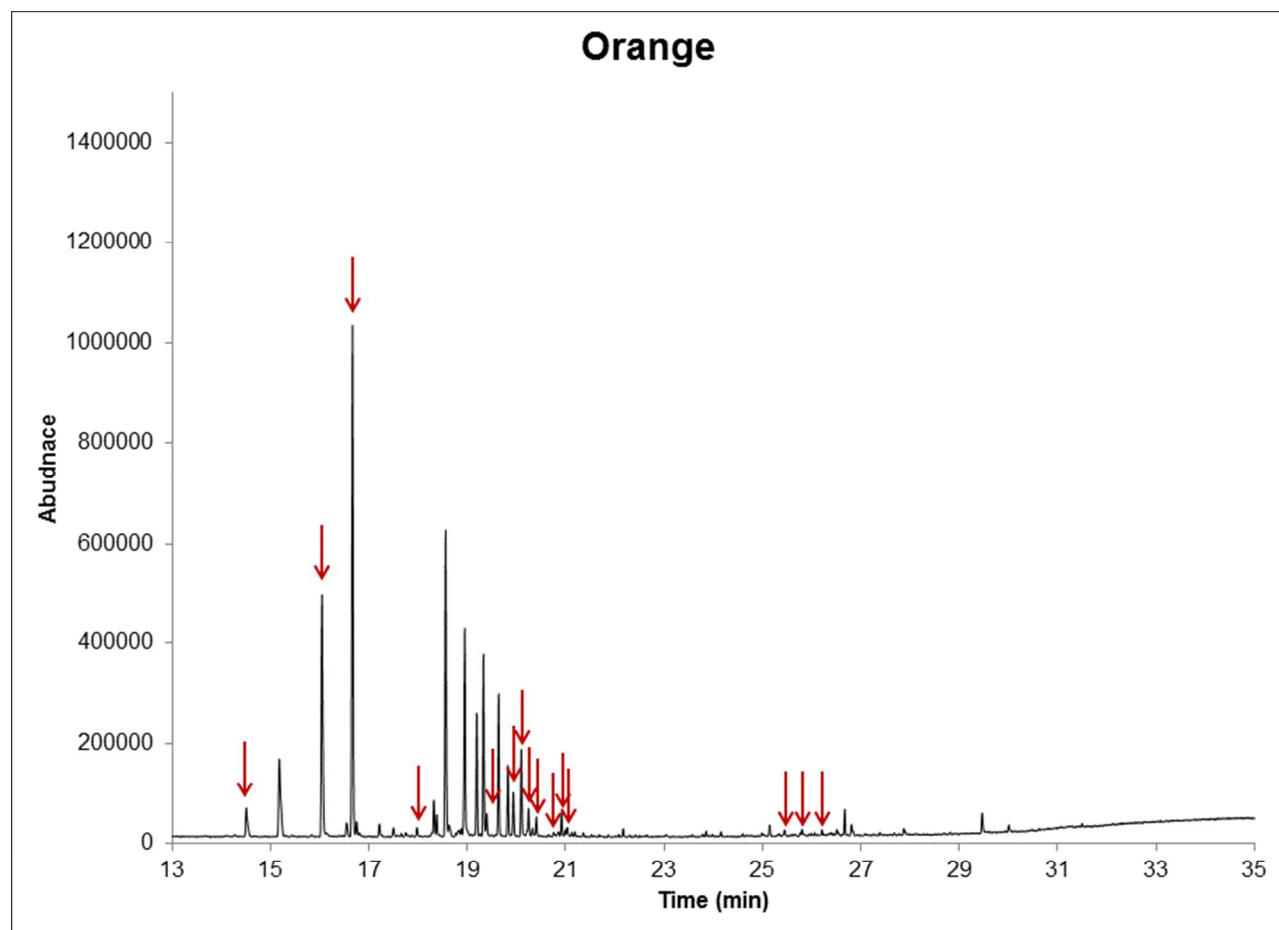

**Figure S2: Grapefruit Peel Extract**

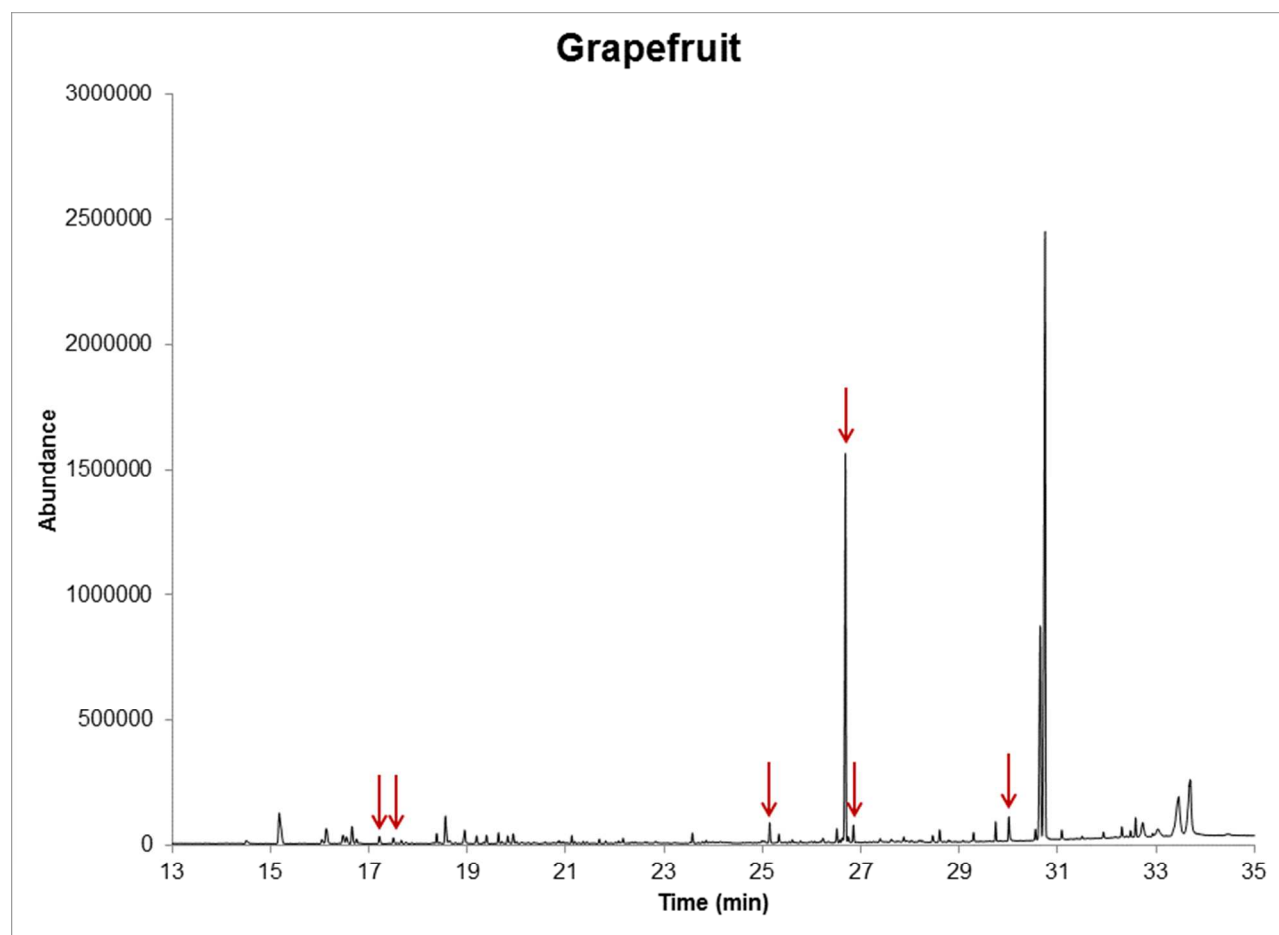

**Figure S3: Tangelo Peel Extract**

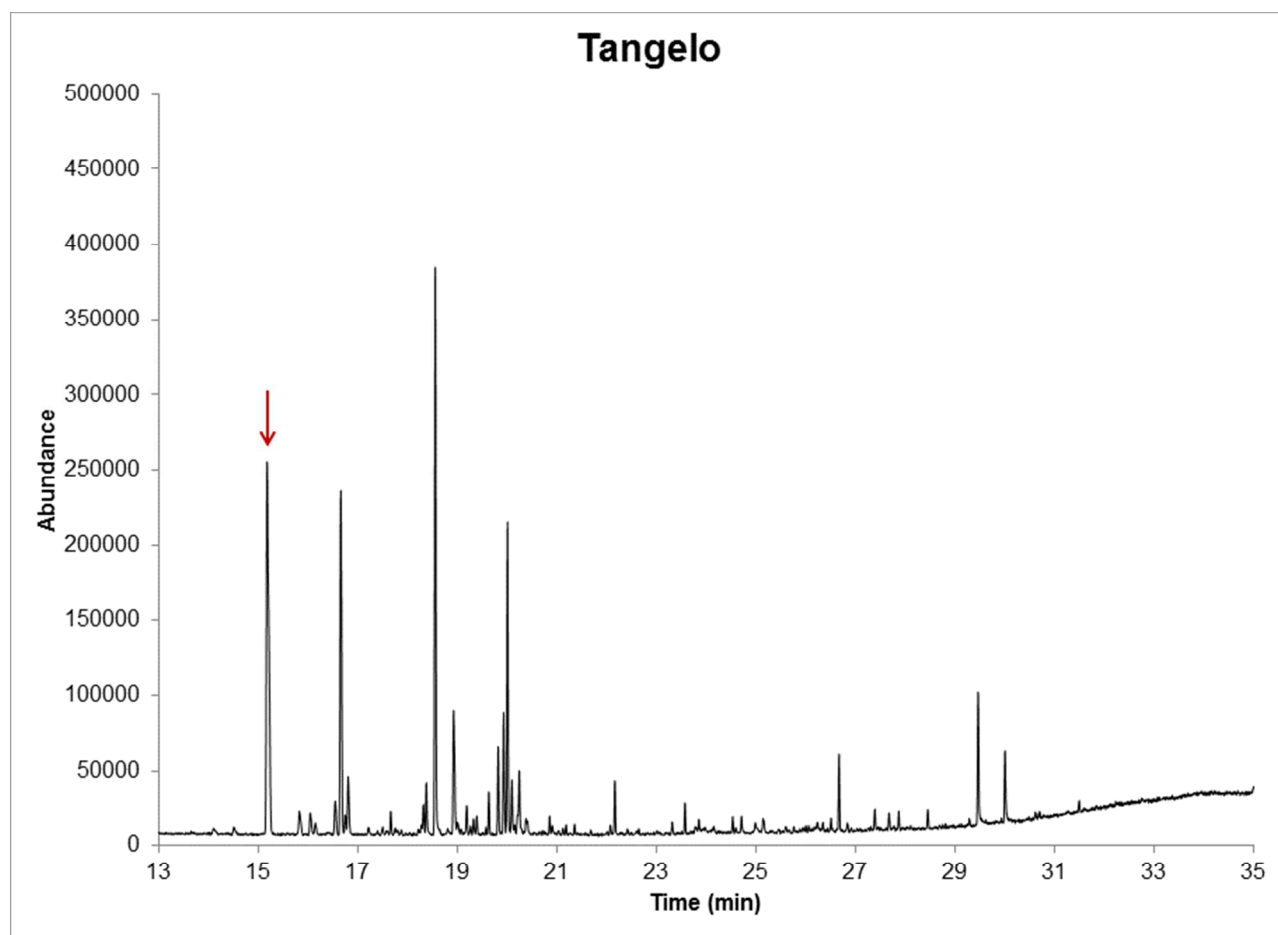

**Figure S4: Lemon Peel Extract**

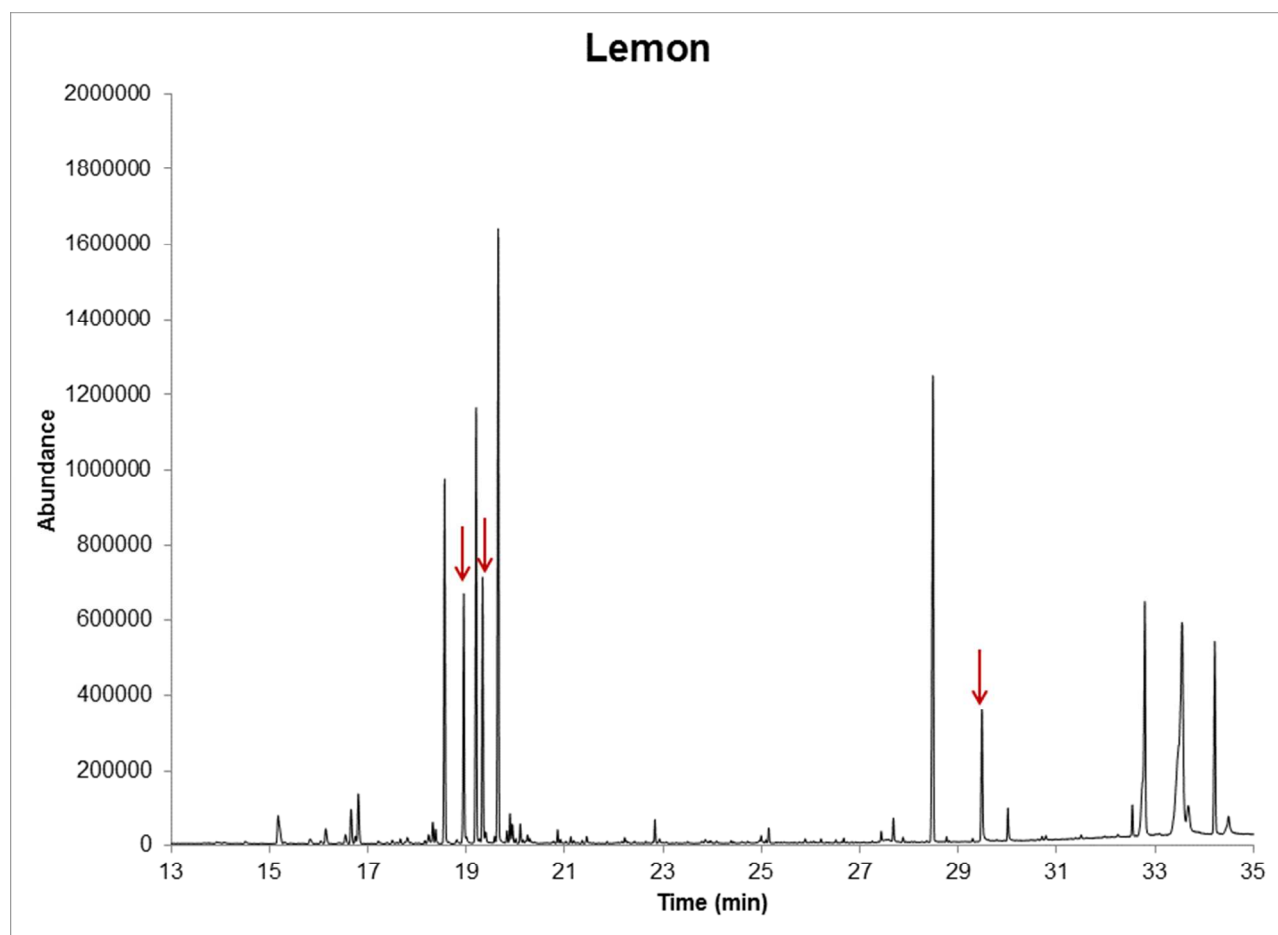

**Figure S5: Lime Peel Extract**

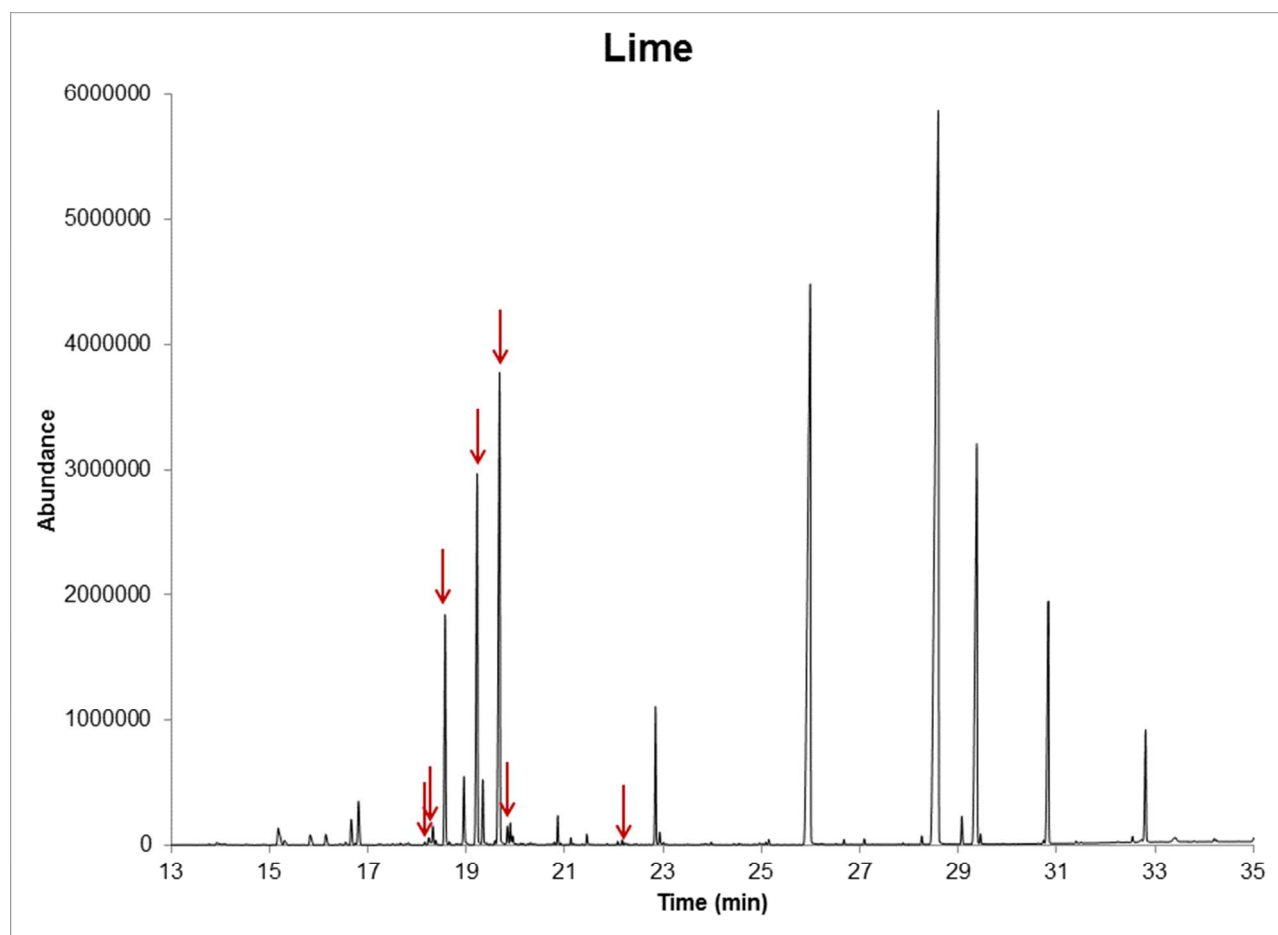

**Figure S6: Reagent Blank**

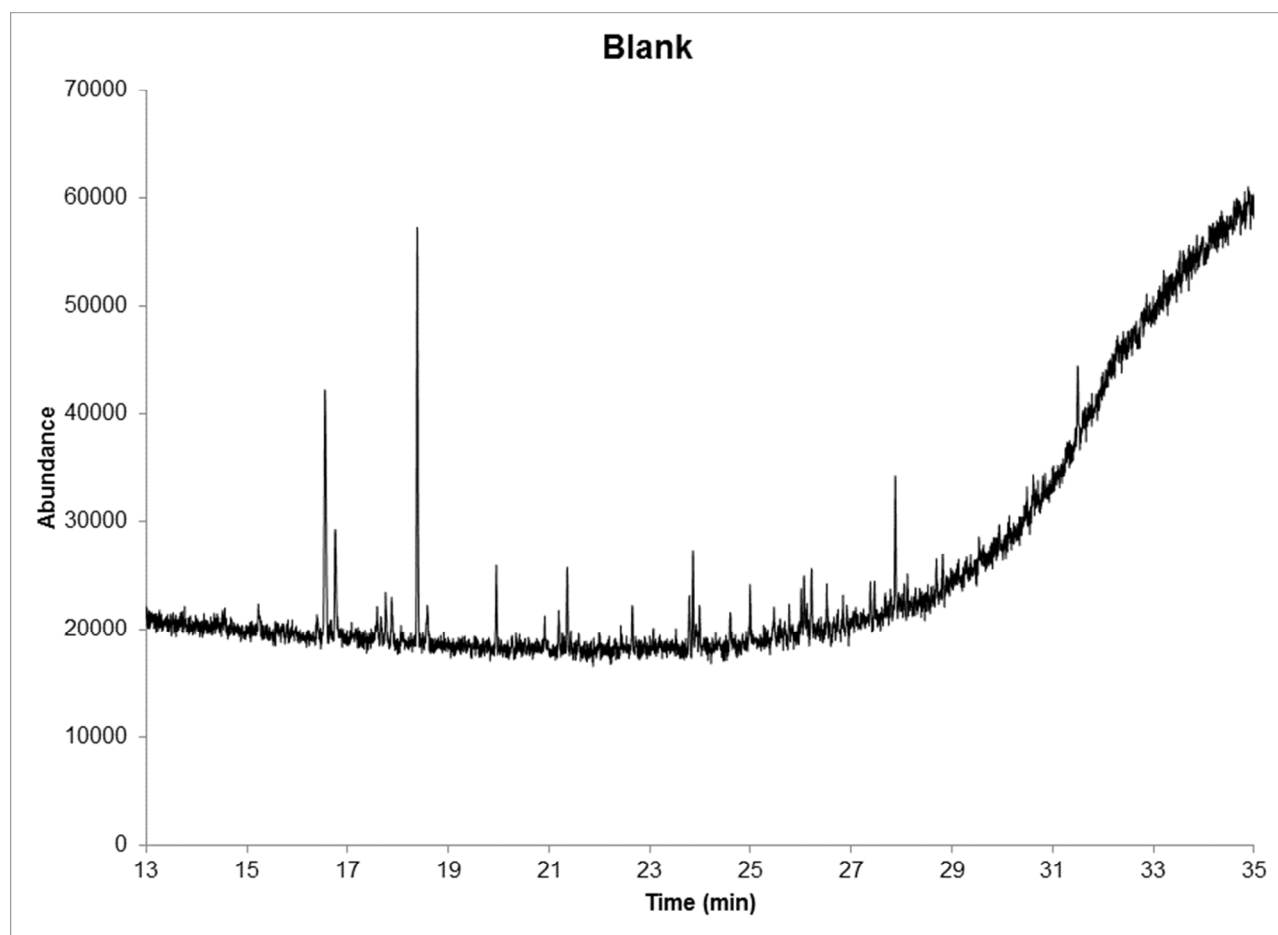

Supplement: Supplementary file 1 [file 3956698]
